# Supplementary material
Source: Research Square preprint supplement (doi:10.21203/rs.3.rs-9039762/v1)
Supplement: Supplementary file 1 [file a70c61ce76d936d4c2544483.docx]

Supplementary Information

Multi-omics reveals the DR5-FXR-CHPT1 axis governs hepatocyte pyroptosis via glycerophospholipid remodeling after major partial hepatectomy

Correspondence to: Linsen Ye, ye_linsen@163.com; Zenan Yuan, yuanzn5@mail.sysu.edu.cn; Changchang Jia, jiachch3@mail.sysu.edu.cn; Hua Li, lihua3@mail.sysu.edu.cn.

**This PDF file includes:**

Figs. S1 to S7

Key resources table


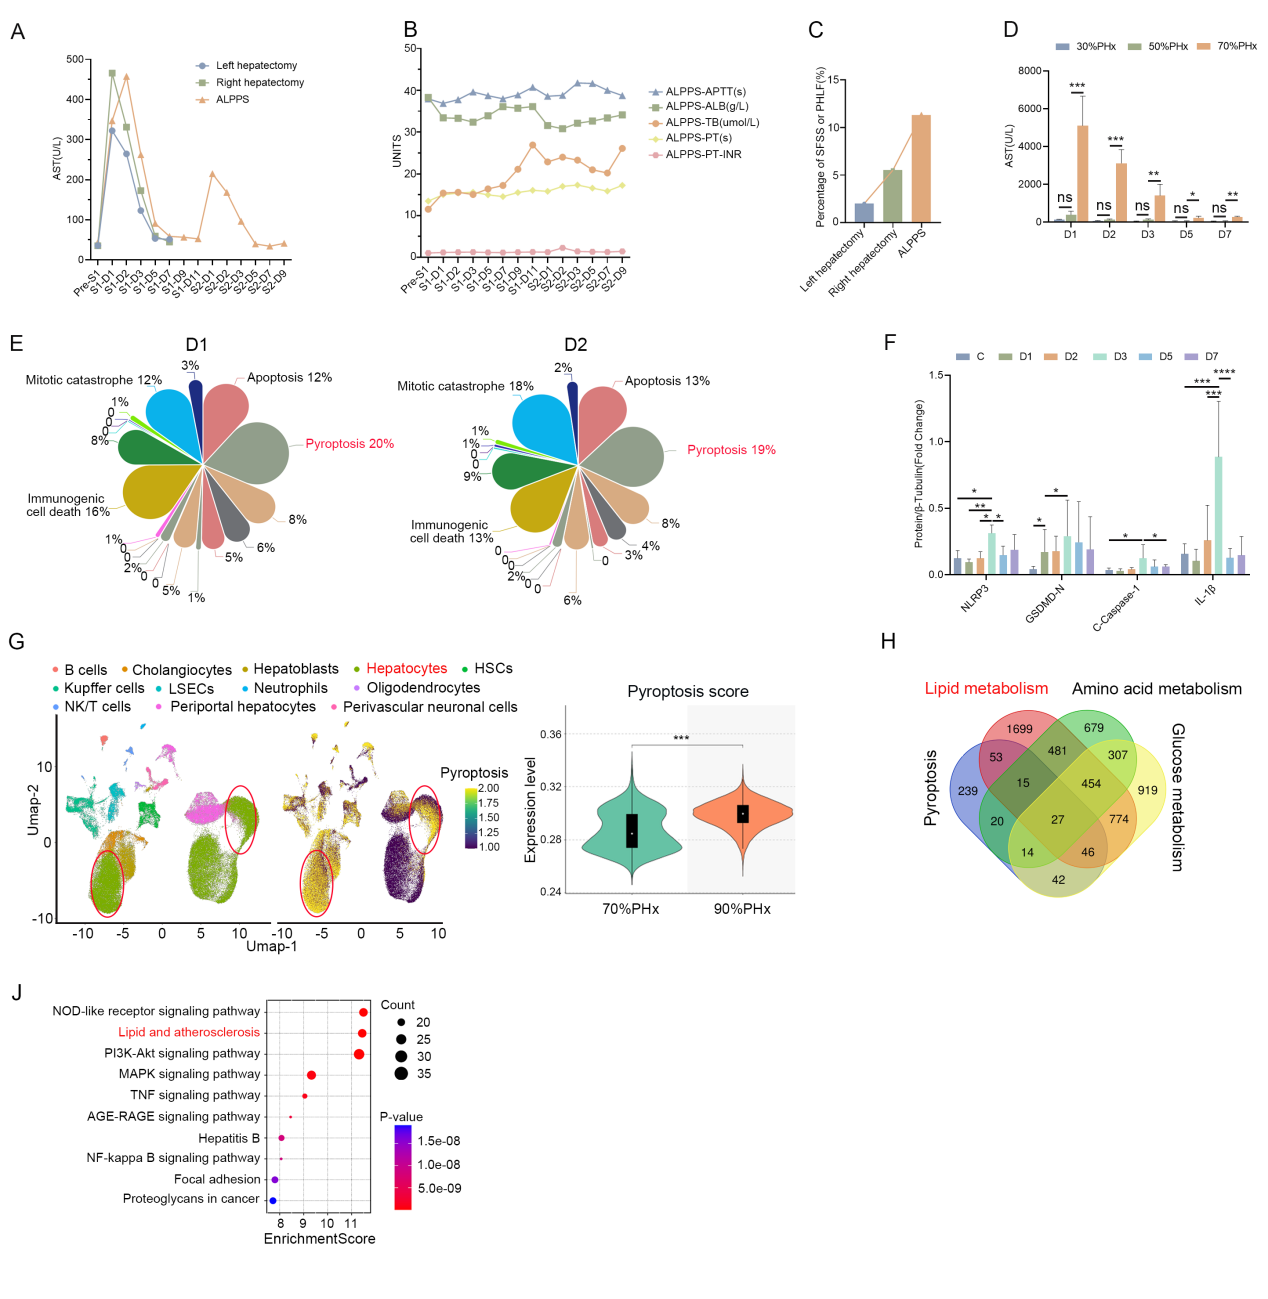


**Supplementary Figure 1. Prediction of cell death modalities following 70% PHx.**

A: Serum AST levels following anatomical left hemihepatectomy, anatomical right hemihepatectomy, and ALPPS. B: The level of APTT, ALB, PT, TB, and PT-INR following ALPPS. C: Comparison of the incidence rates of SFSS or PHLF following anatomical left hemihepatectomy, anatomical right hemihepatectomy, and ALPPS. D: Serum AST levels in mice with different resection volumes at various time points following 70% PHx. E: Classification of cell death patterns derived from RNA-seq DEGs of liver tissue at D1 and D2 following 70% PHx. F: Quantitative statistical analysis of protein expression levels corresponding to Figure 1D. G: Umap of scRNA-seq from the remnant liver at D3 of 90% PHx, (Left) Global cell clustering colored by major cell types; (Right) Umap highlighting cells with enriched PRGs signatures; GSVA scores of PRGs sets in hepatocytes from 70% PHx and 90% PHx. H: Venn diagram identifying upregulated PRGs involved in lipid, glucose, and amino acid metabolism in the 90% PHx scRNA-seq relative to the 70% PHx scRNA-seq. J: KEGG enrichment analysis of upregulated PRGs in the 90% PHx scRNA-seq compared to the 70% PHx scRNA-seq. Abbreviations: C, Control; AST, Aspartate aminotransferase; ALPPS, Associating liver partition and portal vein ligation for staged hepatectomy; PHx, Partial hepatectomy; RNA-seq, RNA sequencing; DEGs: Differentially expressed genes; Supplementary Figure 1C: Pyroptosis, 20%; Immunogenic cell death, 16%; Mitotic catastrophe, 12%; Apoptosis, 12%; Anoikis, 8%; Ferroptosis, 8%; Autophagy , 6%; Necroptosis, 5%; Parthanatos, 5%; MPT (mitochondrial permeability transition-driven necrosis), 3%; Lysosome-dependent cell death, 2%; Disulfidptosis, 1%; Cuproptosis, 1%; NETosis, 1%; Entosis, 0%; Paraptosis, 0%; Entotic cell death, 0%; Methuosis, 0%; Alkaliptosis, 0%; Oxeiptosis, 0%; Netotic cell death. Supplementary Figure 1D: Pyroptosis, 19%; Mitotic catastrophe, 18%; Immunogenic cell death, 13%; Apoptosis, 13%; Anoikis, 9%; Ferroptosis, 8%; Parthanatos, 6%; Autophagy (autophagic cell death), 4%; Necroptosis, 3%; MPT (mitochondrial permeability transition-driven necrosis), 2%; Lysosome-dependent cell death, 2%; Disulfidptosis, 1%; Entosis, 1%; Cuproptosis, 0%; NETosis, 0%; Paraptosis, 0%; Alkaliptosis, 0%; Oxeiptosis, 0%; Methuosis, 0%; Entotic cell death, 0%; Netotic cell death, 0%.


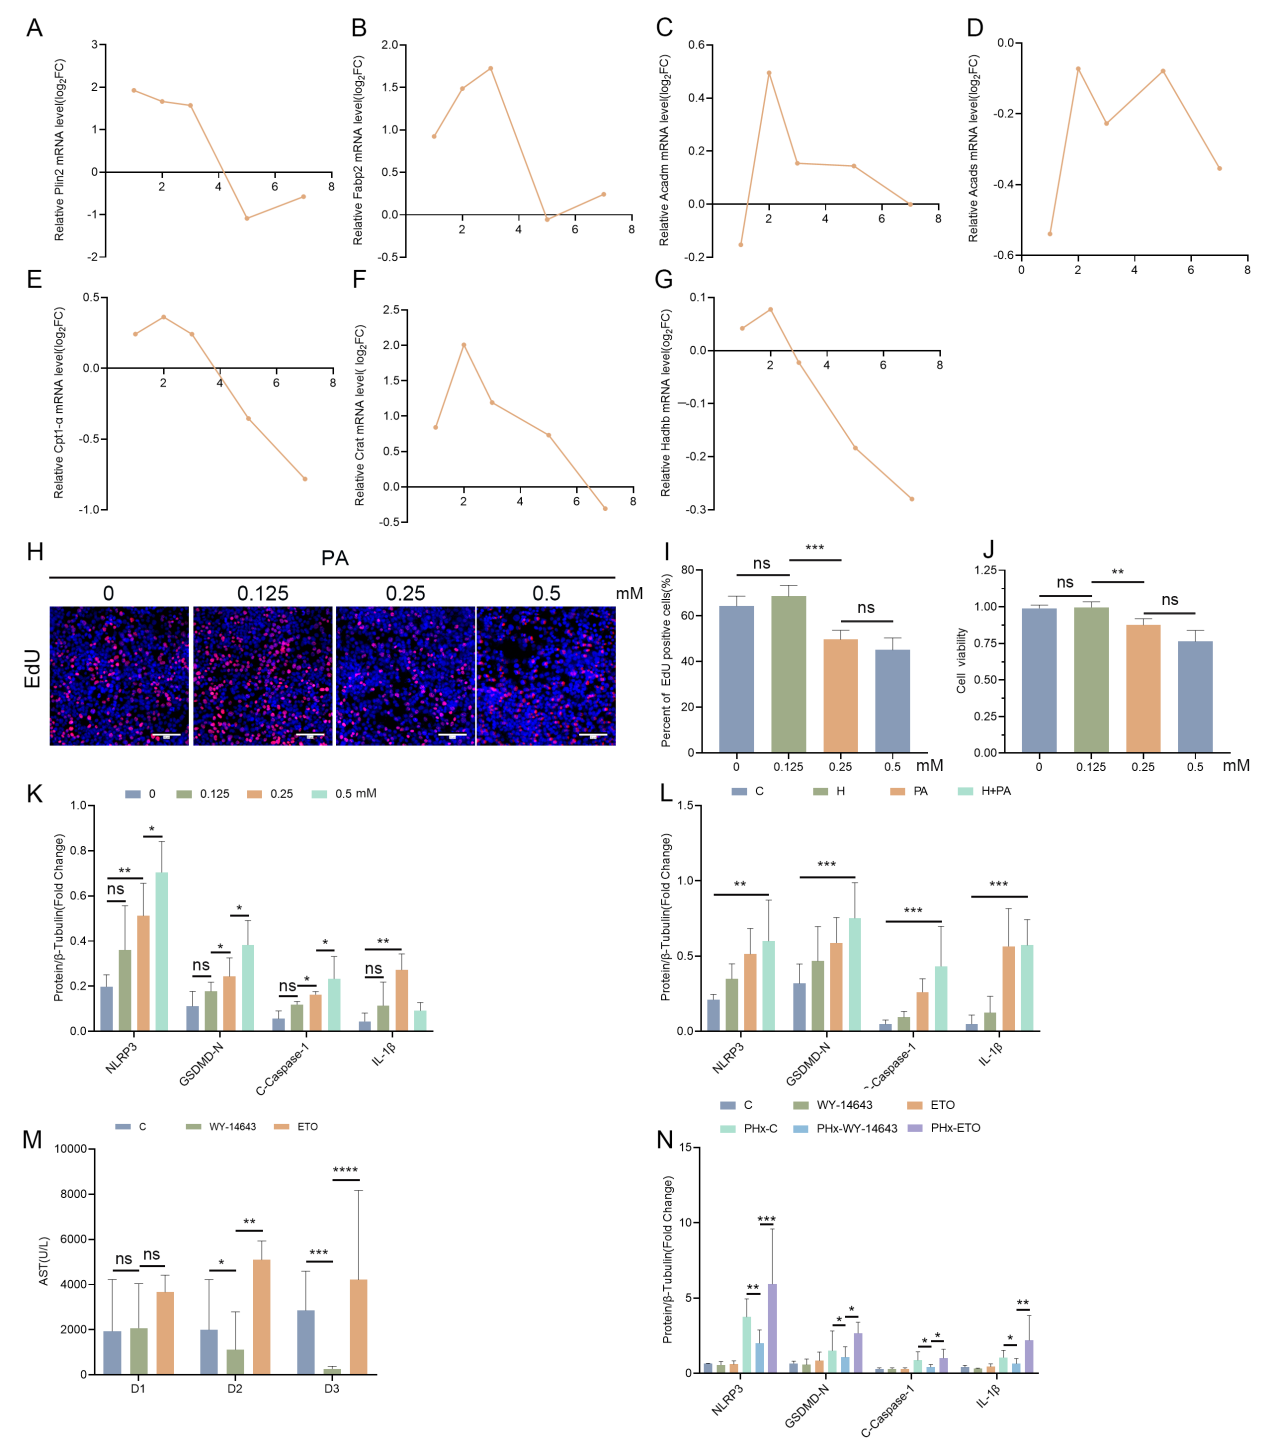


**Supplementary Figure 2. Temporal expression patterns of lipid metabolism-related genes following 70% PHx and their effects on hepatocytes.**

A-G: Line charts showing the dynamic changes in mRNA levels of lipid metabolism-related genes: Plin2 (A), Fabp2 (B), Acadm (C), Acads (D), Cpt1-α (E), Crat (F), and Hadhb (G) at various postoperative time points. H: Representative immunofluorescence images of EdU incorporation in hepatocytes treated with different concentrations of palmitic acid (PA: 0, 0.125, 0.25, and 0.5 mM) for 24 h (Scale bar = 20 μm). I: Statistical quantification of the percentage of EdU-positive cells in M. J: Hepatocyte viability assessed by CCK-8 assay following treatment with different concentrations of PA. K: Quantitative statistical analysis of protein expression levels corresponding to Figure 2G; L: Quantitative statistical analysis of protein expression levels corresponding to Figure 2J. M: Serum AST levels in each group at D1, D2, and D3. N: Quantitative statistical analysis of the Western blot data corresponding to Figure 2P. Abbreviations: Plin2, Perilipin 2; Fabp2, Fatty acid-binding protein 2; Acadm, Medium-chain acyl-CoA dehydrogenase; Acads, Short-chain acyl-CoA dehydrogenase; Cpt1-α, Carnitine palmitoyltransferase 1α; Crat, Carnitine O-acetyltransferase; Hadhb, Hydroxyacyl-CoA dehydrogenase beta subunit; EdU, 5-Ethynyl-2′-deoxyuridine; CCK-8, Cell Counting Kit-8; PA, Palmitic acid; Statistical analysis: Statistical significance was determined by one-way ANOVA. Data are expressed as mean ± SD. Ns: not significant, **p < 0.05, **p < 0.01, ***p < 0.001, and ****p < 0.0001*.


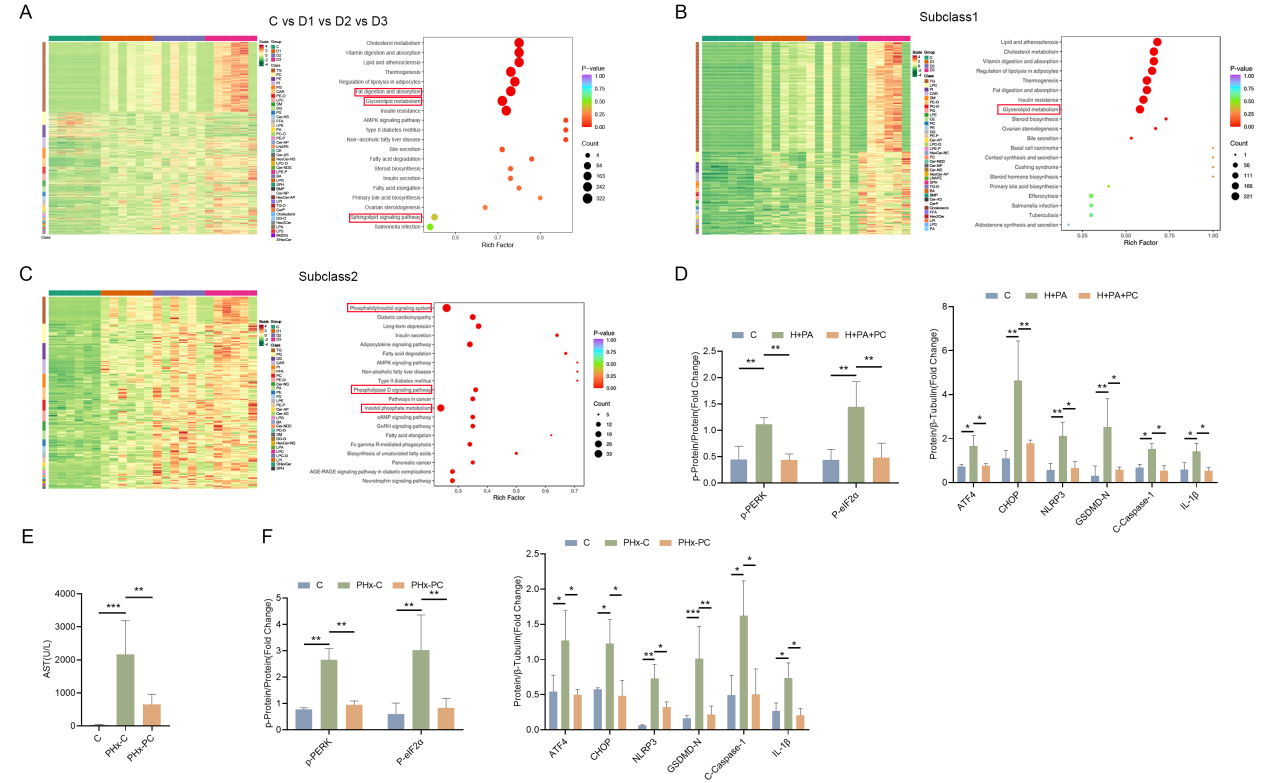


**Supplementary Figure 3. Enrichment analysis of lipidomics-related signaling pathways.**

A: Heatmap clustering of differential lipids and KEGG pathway enrichment analysis for each group. B: Expression heatmap and KEGG enrichment analysis of differential lipids in Subclass1. C: Expression heatmap and KEGG enrichment analysis of differential lipids in Subclass2. D: Quantitative statistical analysis of protein expression levels corresponding to Figure 3H. E: Comparison of serum AST levels in each group. F: Quantitative statistical analysis of protein expression levels corresponding to Figure 3P. Abbreviations: AST, Aspartate aminotransferase; KEGG, Kyoto Encyclopedia of Genes and Genomes; Statistical analysis: Statistical significance was determined by one-way ANOVA. Data are expressed as mean ± SD. Ns: not significant, **p < 0.05, **p < 0.01, ***p < 0.001, and ****p < 0.0001*.

**
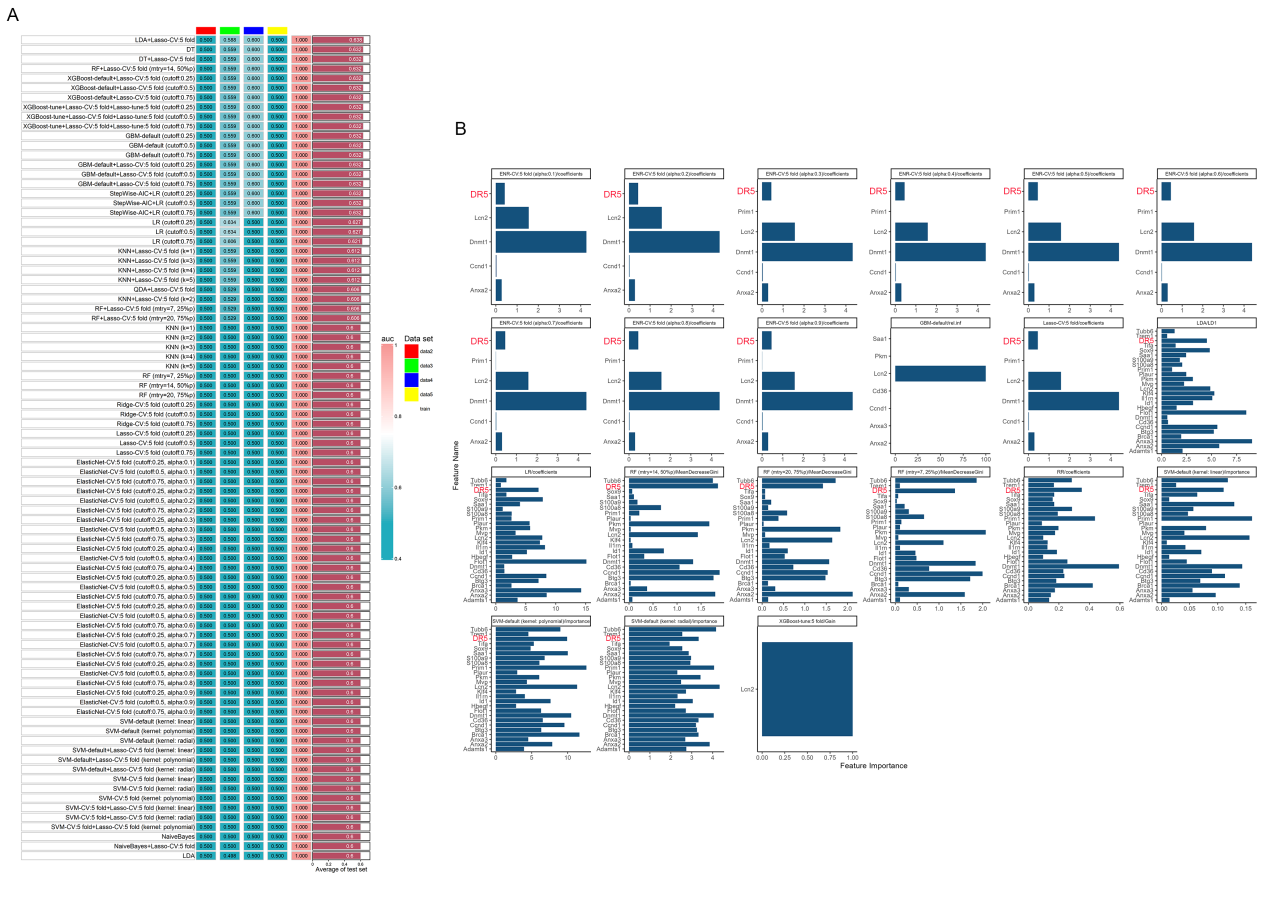
**

**Supplementary Figure 4. Machine Learning-Derived Feature Importance Analysis of Pyroptosis-Related Genes After 70%PHx.**

A: Heatmap of model performance evaluation for candidate gene screening using multiple machine learning algorithms. B: Ranking of feature importance calculated by various machine learning algorithms, displaying the importance scores of genes such as DR5 across different models.


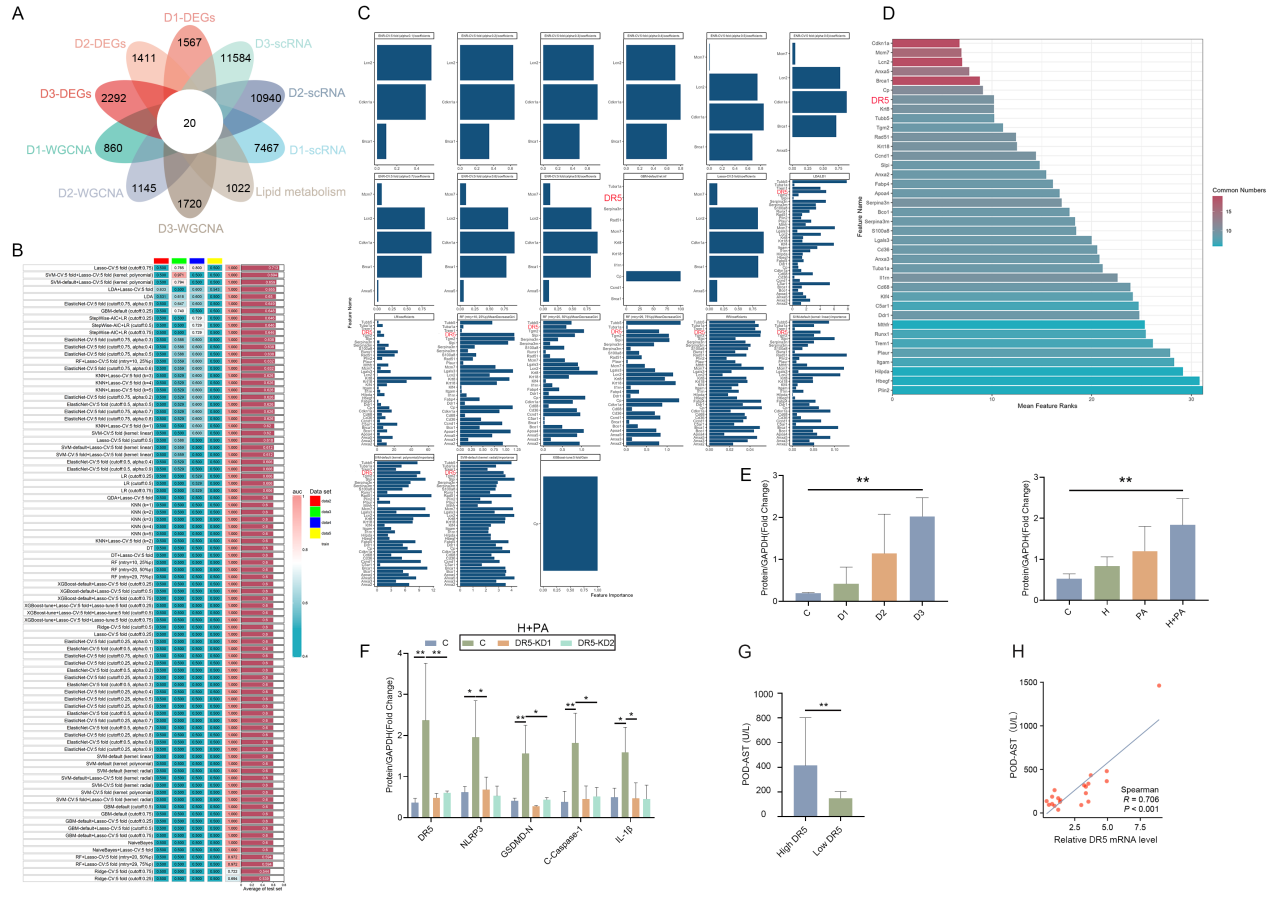


**Supplementary Figure 5. Screening and validation of the key pyroptosis-related feature gene (DR5) using machine learning algorithms.**

A: Venn diagram showing the screening of key genes from the intersection of RNA-seq DEGs, scRNA-seq DEGs, WGCNA gene modules, and known lipid metabolism-related gene sets following 70% PHx. B: Heatmap of model performance evaluation for candidate gene screening using integrated machine learning algorithms. C: Feature importance ranking calculated by various machine learning algorithms. D: Average ranking of feature genes derived from multiple algorithms. E: Quantitative statistical analysis of protein expression levels corresponding to Figure 4H. F: Quantitative statistical analysis of protein expression levels corresponding to Figure 4I. G: Comparison of postoperative serum AST levels between low and high DR5 expression groups classified based on DR5 levels after ALPPS-S2. H: Scatter plot of Spearman correlation analysis between relative DR5 mRNA expression in ALPPS-S2 liver tissue and peak postoperative serum AST levels. Abbreviations: AST, Aspartate aminotransferase; RNA-seq, RNA sequencing; DEGs, Differentially expressed genes; scRNA-seq, Single-cell RNA sequencing; WGCNA, Weighted gene co-expression network analysis; DR5, Death receptor 5; ALPPS-S2, Stage 2 of associating liver partition and portal vein ligation for staged hepatectomy; POD, Postoperative day. Data are expressed as mean ± SD. Ns: not significant, **p < 0.05, **p < 0.01, ***p < 0.001, and ****p < 0.0001*.


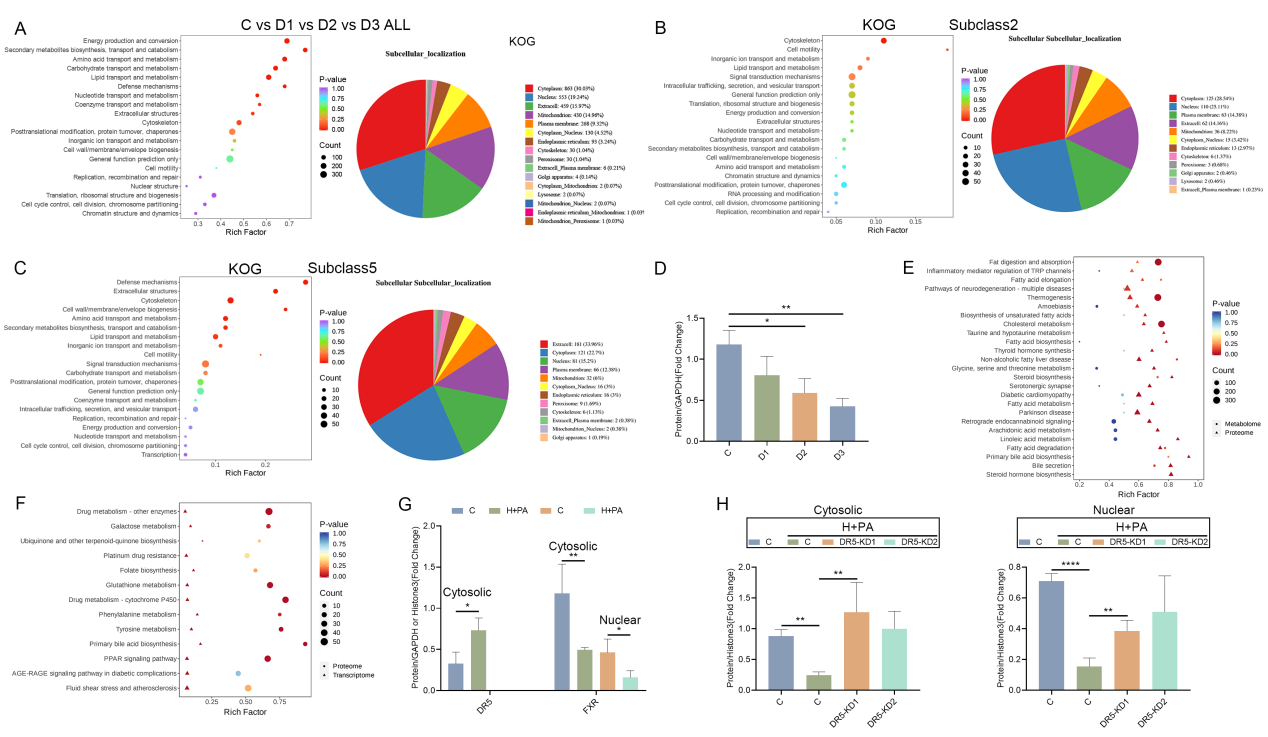


**Supplementary Figure 6. Proteomic Functional Enrichment Analysis and Multi-Omics Screening.**

A: KOG functional classification and subcellular localization analysis of differentially expressed proteins. B: Functional annotation and localization analysis of Subclass2 proteins. C: Functional annotation and localization analysis of Subclass5 proteins. D: Quantitative statistical analysis of protein expression levels corresponding to Figure 5F. E: KEGG pathway enrichment analysis of the joint proteomics and metabolomics analysis. F: KEGG pathway enrichment analysis of the joint proteomics and transcriptomics analysis. G: Quantitative statistical analysis of protein expression levels corresponding to Figure 5I. H: Quantitative statistical analysis of protein expression levels corresponding to Figure 5K. Abbreviations: KEGG, Kyoto Encyclopedia of Genes and Genomes; KOG, euKaryotic Orthologous Groups.Data are expressed as mean ± SD. Ns: not significant, **p < 0.05, **p < 0.01, ***p < 0.001, and ****p < 0.0001*.


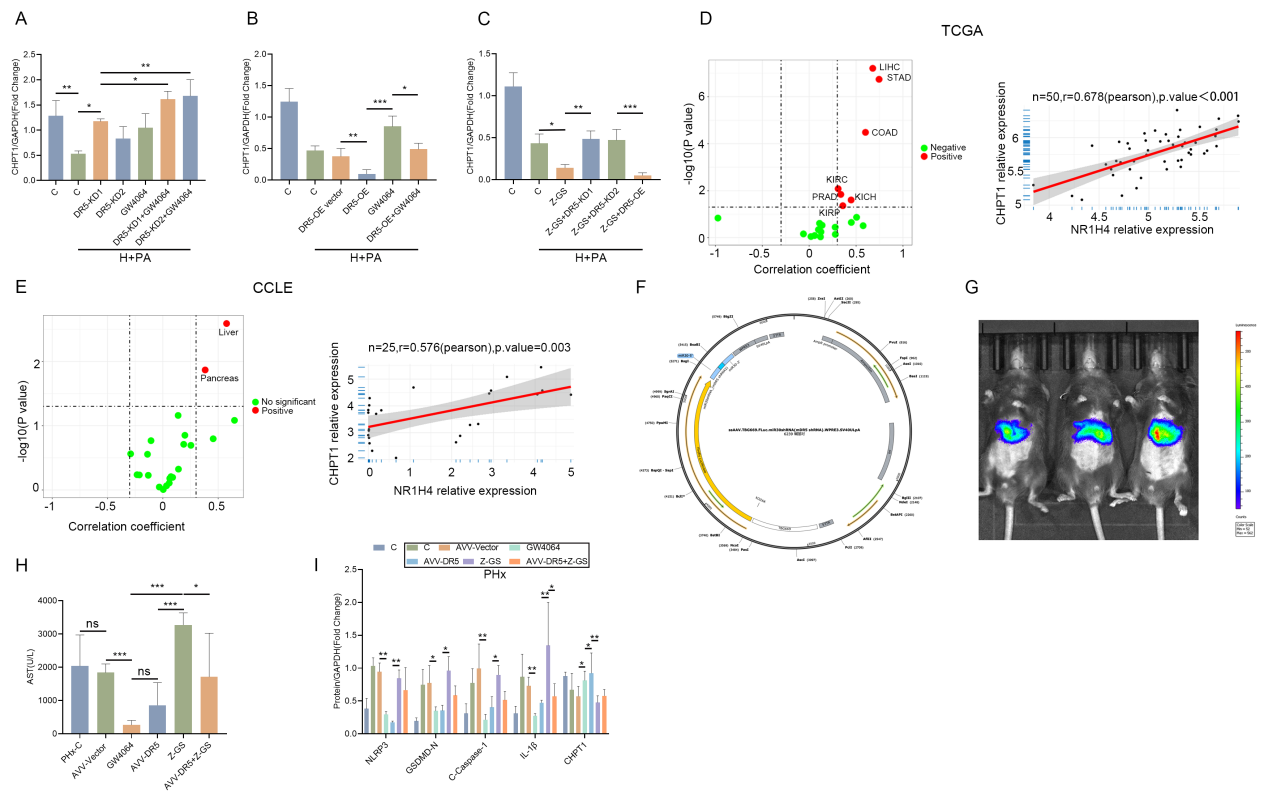


**Supplementary Figure 7. Validation of the DR5–FXR–CHPT1 Axis in Mediating Pyroptosis and Liver Injury.**

A: Quantitative statistical analysis of protein expression levels corresponding to Figure 6A. B: Quantitative statistical analysis of protein expression levels corresponding to Figure 6B. C: Quantitative statistical analysis of protein expression levels corresponding to Figure 6C. D: Correlation between CHPT1 and NR1H4 (FXR) expression in the liver from the TCGA database. E: Correlation between CHPT1 and NR1H4 (FXR) expression in liver cell lines from the CCLE database. F: Map of the AAV-DR5 plasmid construction. G: In vivo imaging showing specific targeted infection and expression in the liver region following AAV-DR5 virus injection. H: Serum AST levels in each group. I: Quantitative statistical analysis of protein expression levels corresponding to Figure 6M. Abbreviations: CHPT1, Choline phosphotransferase 1; NR1H4, Nuclear receptor subfamily 1 group H member 4 (also known as FXR, farnesoid X receptor); TCGA, The Cancer Genome Atlas; CCLE, Cancer Cell Line Encyclopedia; AAV-DR5, Adeno-associated virus vector encoding/knock down death receptor 5; AST, Aspartate aminotransferase. Data are expressed as mean ± SD. Ns: not significant, **p < 0.05, **p < 0.01, ***p < 0.001, and ****p < 0.0001*.

**Key resources table**

**1.1 Antibodies**

| **Name** | **Supplier** | **Cat no.** |
| --- | --- | --- |
| NLRP3 | Abcam | ab263899 |
| Gasdermin D | CST | 39754 |
| IL-1β | Abcam | ab283818 |
| Cleaved-Caspase-1 | CST | 89332、4199 |
| PERK | CST | 3192 |
| P-PERK | ABclonal | AP1501 |
| eIF2α | CST | 5324 |
| P-eIF2α | ABclonal | AP0692 |
| ATF4 | Affinity | DF6008 |
| CHOP | Affinity | AF6277 |
| DR5 | Abcam | ab8416 |
| FXR/NR1H4 | CST | 72105 |
| CHPT1 | ABclonal | A16137 |
| β-Tubulin | CST | 2146 |
| Histone3 | CST | 4499 |
| GAPDH | CST | 2118 |
| Alexa Fluor 488-conjugated goat anti-mouse IgG | Invitrogen | 2714439 |
| Alexa Fluor 546-conjugated goat anti-rabbit IgG | Invitrogen | 2570547 |

**1.2 Sequence-based reagents**

| **Name** | **Sequence** | **Supplier** |
| --- | --- | --- |
| M-*18S*-F1 | GGTGGAGTCATACGCATTCTGG | Tsingke |
| M-*18S*-R1 | ACAGCATTCCCAGTGCCTTGGA | Tsingke |
| H-*18S*-F1 | ACCCGTTGAACCCCATTCGTGA | Tsingke |
| H-*18S*-R1 | GCCTCACTAAACCATCCAATCGG | Tsingke |
| M-*DR5*-F1 | TGTGTCGATGCAAACCAGGCAC | Tsingke |
| M-*DR5*-R1 | GCCGTTTTGGAGACACACTTCC | Tsingke |
| H-*DR5*-F1 | AGCACTCACTGGAATGACCTCC | Tsingke |
| H-*DR5*-R1 | GTGCCTTCTTCGCACTGACACA | Tsingke |
| H-*PERK*-F1 | GTCCCAAGGCTTTGGAATCTGTC | Tsingke |
| H-*PERK*-R1 | CCTACCAAGACAGGAGTTCTGG | Tsingke |
| M-*Perk*-F1 | CCGATGTCAGTGACAACAGCTG | Tsingke |
| M-*Perk*-R1 | AAGACAACGCCAAAGCCACCAC | Tsingke |
| H-*ATF4*-F1 | TTCTCCAGCGACAAGGCTAAGG | Tsingke |
| H-*ATF4*-R1 | CTCCAACATCCAATCTGTCCCG | Tsingke |
| M-*Atf4*-F1 | AACCTCATGGGTTCTCCAGCGA | Tsingke |
| M-*Atf4*-R1 | CTCCAACATCCAATCTGTCCCG | Tsingke |
| H-*DDIT3*-F1 | GGTATGAGGACCTGCAAGAGGT | Tsingke |
| H-*DDIT3*-R1 | CTTGTGACCTCTGCTGGTTCTG | Tsingke |
| M-*Ddit3*-F1 | GGAGGTCCTGTCCTCAGATGAA | Tsingke |
| M-*Ddit3*-R1 | GCTCCTCTGTCAGCCAAGCTAG | Tsingke |
| CHPT1-Chip-up | AGTTCGTGGACCC | Tsingke |
| CHPT1-Chip-down | GGGTCCACGAACT | Tsingke |

**1.3 Other (e.g. drugs etc.)**

| **Drugs** | **Supplier** | **Cat no.** |
| --- | --- | --- |
| Mouse interleukin 18 (IL-18) enzyme-linked immunosorbent assay kit | Elabscience | E-EL-M0730 |
| Mouse interleukin 1β (IL-1β) enzyme-linked immunosorbent assay kit | Elabscience | E-EL-M0037 |
| isoflurane | RWD | R510-22 |
| Dako REAL™ EnVision™ Detection  System | Dako | K5007 |
| ChIP Assay Kit | Merck millipore | 17-10086 |
| ECL Western Blotting kit | NCM | P10300 |
| TRIzol | ThermoFisher | 15596026 |
| Oil Red O staining | Beyotime | C0158S |
| Rat tail collagen type I | Solarbio | C8062 |
| glucose-free DMEM | Gibco | 11966025 |
| RPMI 1640 | Gibco | C11875500BT |
| DMEM | Gibco | C11995500BT |
| FBS | Gibco | 10099141C |
| polyene phosphatidylcholine | Weishi | hbws-958 |
| WY-14643 | MCE | HY-16995 |
| Etomoxir(ETO） | Selleck | S8244 |
| GW4064 | MCE | HY-50108 |
| L-α-phosphatidylcholine | Sigma-Aldrich | P5394 |
| (Z)-Guggulsterone(Z-GS) | MCE | HY-110066 |
| Nuclear and Cytoplasmic Protein Extraction Kit | Beyotime | P0028 |
| Protein A/G Magnetic Beads | Elabscience | EA-IP-007M |
| CCK-8 | KeyGEN | KGA317 |
